# Supplementary material
Source: Springer Nature journal article supplement (https://www.springermedizin.de/resource/supplementary/13075_2013_4106_MOESM1_ESM.pdf/9696076)
Supplement: MOESM1 [file 9696076]

[February, 2008 – December, 2010]

Randomized (n=200)

Allocated to IA-HA (n=100)  
(High molecular weight 2,700 kDa HA, Suvenyl<sup>®</sup>)

Allocated to NSAID (n=100)  
(loxoprofen sodium, Loxonin<sup>®</sup>)

Excluded (n=1)  
◆ Withdrew consent before  
initial administration (1)

Excluded (n=7)  
◆ Duplicated recruiting (1)  
◆ Withdrew consent before  
initial administration (6)

FAS data set  
(n=192)

Eligible to efficacy  
(n=99)

Eligible to efficacy  
(n=93)

Excluded (n=1)  
◆ Lost to follow up (n=1)

Primary endpoint  
To analysis for  
JKOM score  
(n=184)

Excluded (n=7)  
◆ Lost to follow up (n=7)

Eligible to efficacy  
(n=98)

Eligible to efficacy  
(n=86)

Excluded (n=1)  
◆ No VAS score at initial  
assessment

Secondary endpoint  
To analysis for  
VAS score  
(n=182)

Excluded (n=1)  
◆ No VAS score at final  
assessment

Eligible to efficacy  
(n=97)

Eligible to efficacy  
(n=85)
